# Supplementary material
Source: PubMed Central journal article supplement (PMC2978971)
Supplement: mmc1.pdf [file mmc1.pdf]

**Supplemental Data**

**SOBP Is Mutated in Syndromic  
and Nonsyndromic Intellectual Disability and Is  
Highly Expressed in the Brain Limbic System**

Efrat Birk, Adi Har-Zahav, Chiara M. Manzini, Metsada Pasmanik-Chor, Liora Kornreich, Christopher A. Walsh, Konrad Noben-Trauth, Adi Albin, Amos J. Simon, Laurence Colleaux,<sup>8</sup> Yair Morad, Limor Rainshtein, David J. Tischfield, Peter Wang, Nurit Magal, Idit Maya, Noa Shoshani, Gidon Rehavi, Doron Gothelf, Gal Maydan, Mordechai Shohat, and Lina Basel-Vanagaite

**Table S1. Two-Point LOD Score**

| Marker name | Recombination fraction |        |        |        |        |        |        |
|-------------|------------------------|--------|--------|--------|--------|--------|--------|
|             | 0.00                   | 0.01   | 0.05   | 0.10   | 0.20   | 0.30   | 0.40   |
| D6S1671     | 2.2614                 | 2.6604 | 2.9151 | 2.7974 | 2.2442 | 1.4953 | 0.6168 |
| D6S962      | 1.8575                 | 1.8250 | 1.6929 | 1.5221 | 1.1595 | 0.7622 | 0.3294 |
| D6S468      | 2.2614                 | 2.1155 | 1.9584 | 1.7568 | 1.3340 | 0.8774 | 0.6168 |
| D6S449      | 2.1543                 | 2.1155 | 1.9584 | 1.7568 | 1.3340 | 0.8774 | 0.3829 |
| D6S1709     | 4.4545                 | 4.3735 | 4.0449 | 3.6230 | 2.7401 | 1.7947 | 0.7807 |
| D6S1021     | 1.8575                 | 1.8250 | 1.6929 | 1.5221 | 1.1595 | 0.7622 | 0.3294 |
| D6S447      | 4.4545                 | 4.3735 | 4.0449 | 3.6230 | 2.7401 | 1.7947 | 0.7807 |
| D6S1592     | 4.4545                 | 4.3735 | 4.0449 | 3.6230 | 2.7401 | 1.7947 | 0.7807 |
| D6S268      | 1.8575                 | 1.8250 | 1.6929 | 1.5221 | 1.1595 | 0.7622 | 0.3294 |
| D6S1594     | 4.4545                 | 4.3735 | 4.0449 | 3.6230 | 2.7401 | 1.7947 | 0.7807 |
| D6S2431     | 4.2613                 | 4.1833 | 3.8667 | 3.4600 | 2.6053 | 1.6818 | 0.6847 |

**Table S2. Primers Used to Amplify the *SOBP* Gene**

| Primer Pair | Exon | Primer Sequence (5'→3') |                            |
|-------------|------|-------------------------|----------------------------|
|             |      | Forward                 | Reverse                    |
| 1           | 1    | TCTCCGCACTATCCTTACCC    | CGAGTTGGCCTCTGCTTAC        |
| 2           | 2    | TGAACACCACACTAGGGGAAG   | GGAAAGCACTATTGGGGATG       |
| 3           | 3    | TTGGGTTCATGGCCATTTTA    | TGATGCCTGTATTAACATTTCTTACC |
| 4           | 4    | CACTTCTTCTCCAAGGTCCAG   | GCATGACACAAAAGGGGAAT       |
| 5           | 5    | GGATTCCCGTTTGTGAATG     | AAAAGATTGCAAACAATTTGAGA    |
| 6           | 6    | TGCCTGTTTGAGAAGTGCTG    | CATGATCTGCTGCTCCATGA       |
| 7           | 6b   | TCTGACACTGCCAACTGCTC    | GCGTTCGGAATGAAGTTCTC       |
| 8           | 6c   | GTGCCCCAGATGATGAATTT    | G TTCACGATGACGTTGCAG       |
| 9           | 6d   | CAACGGGGAGAACTTCATTC    | GTTTTGGCACAGGCTGGAT        |
| 10          | 6e   | GACAAGTCAGACCCGAACCT    | AGCTGCTGGCTCAGAATGTT       |

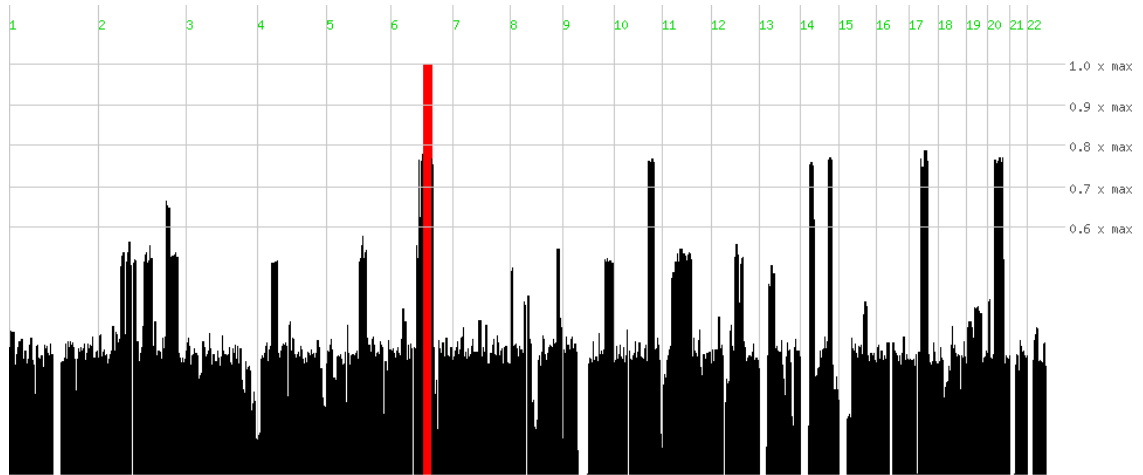

**Figure S1. Whole Genome Homozygosity Mapping Performed on Patients IV-1, IV-2, IV-4 and IV-7.**

Green numbers indicate chromosome number; a red spike depicts an area of homozygosity.

**Figure S2. Multiple Protein Sequence Alignment of SOBP Orthologs - Uniprot**  
**Mammalian Alignment**

|                   |                                                                    |     |              |
|-------------------|--------------------------------------------------------------------|-----|--------------|
| <u>Chimp_SOBP</u> | MAEMEKEGRPPENKRSRKPAHPVKREINEEMKNFAENTMNELLGWYGDKVE LKDGEDIE       | 60  |              |
| <u>A7XYQ1</u>     | MAEMEKEGRPPENKRSRKPAHPVKREINEEMKNFAENTMNELLGWYGDKVE LKDGEDIE       | 60  | SOBP_HUMAN   |
| <u>A7XYI9</u>     | MAEMEKEGRPPENKRSRKPAHPVKREINEEMKNFAENTMNELLGWYGDKVE LKDGEDIE       | 60  | A7XYI9_MACMU |
| <u>A7XYH9</u>     | MAEMEKEGRPPENKRSRKPAHPVKREINEEMKNFAENTMNELLGWYGDKVE LKDGEDIE       | 60  | SOBP_BOVIN   |
| <u>Q0P5V2</u>     | MAEMEKEGRPPENKRSRKPAHPVKREINEEMKNFAENTMNELLGWYGDKVE LKDGEDIE       | 60  | SOBP_MOUSE   |
| <u>A7XYI6</u>     | MAEMEKEGRPPENKRSRKPAHPVKREINEEMKNFAENTMNELLGWYGDKVE LKDGEDIE       | 60  | SOBP_RAT     |
| *****             |                                                                    |     |              |
| <u>Chimp_SOBP</u> | FRSYPTDGGESRQHSVLKENSLPKPKLPEDSVISPYNI STGYSGLATGNGLSDS PAGESK     | 120 |              |
| <u>A7XYQ1</u>     | FRSYPTDGGESRQHSVLKENSLPKPKLPEDSVISPYNI STGYSGLATGNGLSDS PAGESK     | 120 | SOBP_HUMAN   |
| <u>A7XYI9</u>     | FRSYPTDGGESRQHSVLKENSLPKPKLPEDSVISPYNI STGYSGLATGNGLSDS PAGESK     | 120 | A7XYI9_MACMU |
| <u>A7XYH9</u>     | FRSYPTDGGESRQHSVLKENSLPKPKLPEDSVISPYNI STGYSGLATGNGLSDS PAGESK     | 120 | SOBP_BOVIN   |
| <u>Q0P5V2</u>     | FRSYPTDGGESRQHSVLKENSLPKPKLPEDSVISPYNI STGYSGLATGNGLSDS PAGESK     | 120 | SOBP_MOUSE   |
| <u>A7XYI6</u>     | FRSYPTDGGESRQHSVLKENSLPKPKLPEDSVISPYNI STGYSGLATGNGLSDS PAGESK     | 120 | SOBP_RAT     |
| *****             |                                                                    |     |              |
| <u>Chimp_SOBP</u> | HGNVPIIVPLIPPPFIKPPAEDDVSNOVIMCAWCQKVGIKRYSLSMGSSEVKSFCSEKCPA      | 180 |              |
| <u>A7XYQ1</u>     | HGNVPIIVPLIPPPFIKPPAEDDVSNOVIMCAWCQKVGIKRYSLSMGSSEVKSFCSEKCPA      | 180 | SOBP_HUMAN   |
| <u>A7XYI9</u>     | HGNVPIIVPLIPPPFIKPPAEDDVSNOVIMCAWCQKVGIKRYSLSMGSSEVKSFCSEKCPA      | 180 | A7XYI9_MACMU |
| <u>A7XYH9</u>     | HGNVPIIVPLIPPPFIKPPAEDDVSNOVIMCAWCQKVGIKRYSLSMGSSEVKSFCSEKCPA      | 180 | SOBP_BOVIN   |
| <u>Q0P5V2</u>     | HGNVPIIVPLIPPPFIKPPAEDDVSNOVIMCAWCQKVGIKRYSLSMGSSEVKSFCSEKCPA      | 180 | SOBP_MOUSE   |
| <u>A7XYI6</u>     | HGNVPIIVPLIPPPFIKPPAEDDVSNOVIMCAWCQKVGIKRYSLSMGSSEVKSFCSEKCPA      | 180 | SOBP_RAT     |
| *****             |                                                                    |     |              |
| <u>Chimp_SOBP</u> | ACRRAYFKRNKARDEDGHAENFPQQHYAKE TPRLAFKNNCEL LVCDWC KHIRHTKEYLDF    | 240 |              |
| <u>A7XYQ1</u>     | ACRRAYFKRNKARDEDGHAENFPQQHYAKE TPRLAFKNNCEL LVCDWC KHIRHTKEYLDF    | 240 | SOBP_HUMAN   |
| <u>A7XYI9</u>     | ACRRAYFKRNKARDEDGHAENFPQQHYAKE TPRLAFKNNCEL LVCDWC KHIRHTKEYLDF    | 240 | A7XYI9_MACMU |
| <u>A7XYH9</u>     | ACRRAYFKRNKARDEDGHAENFPQQHYAKE TPRLAFKNNCEL LVCDWC KHIRHTKEYLDF    | 240 | SOBP_BOVIN   |
| <u>Q0P5V2</u>     | ACRRAYFKRNKARDEDGHAENFPQQHYAKE TPRLAFKNNCEL LVCDWC KHIRHTKEYLDF    | 240 | SOBP_MOUSE   |
| <u>A7XYI6</u>     | ACRRAYFKRNKARDEDGHAENFPQQHYAKE TPRLAFKNNCEL LVCDWC KHIRHTKEYLDF    | 240 | SOBP_RAT     |
| *****             |                                                                    |     |              |
| <u>Chimp_SOBP</u> | GDGERRLQFCSAKCLNOYKMDIFYKETQANLPAGLCSTLHPPMENKAE GTGVQLLTPD SW     | 300 |              |
| <u>A7XYQ1</u>     | GDGERRLQFCSAKCLNOYKMDIFYKETQANLPAGLCSTLHPPMENKAE GTGVQLLTPD SW     | 300 | SOBP_HUMAN   |
| <u>A7XYI9</u>     | GDGERRLQFCSAKCLNOYKMDIFYKETQANLPAGLCSTLHPPMENKAE GTGVQLLTPD SW     | 300 | A7XYI9_MACMU |
| <u>A7XYH9</u>     | GDGERRLQFCSAKCLNOYKMDIFYKETQANLPAGLCSTLHPPMENKAE GTGVQLLTPD SW     | 300 | SOBP_BOVIN   |
| <u>Q0P5V2</u>     | GDGERRLQFCSAKCLNOYKMDIFYKETQANLPAGLCSTLHPPMENKAE GTGVQLLTPD SW     | 300 | SOBP_MOUSE   |
| <u>A7XYI6</u>     | GDGERRLQFCSAKCLNOYKMDIFYKETQANLPAGLCSTLHPPMENKAE GTGVQLLTPD SW     | 300 | SOBP_RAT     |
| *****             |                                                                    |     |              |
| <u>Chimp_SOBP</u> | NIPLTDARRKAPSPVATAGQSQGGPSSASTTVSPSDTANC SVTKIPTVPVKSIPISETPN      | 360 |              |
| <u>A7XYQ1</u>     | NIPLTDARRKAPSPVATAGQSQGGPSSASTTVSPSDTANC SVTKIPTVPVKSIPISETPN      | 360 | SOBP_HUMAN   |
| <u>A7XYI9</u>     | NIPLTDARRKAPSPVATAGQSQGGPSSASTTVSPSDTANC SVTKIPTVPVKSIPISETPN      | 360 | A7XYI9_MACMU |
| <u>A7XYH9</u>     | NIPLTDARRKAPSPVATAGQSQGGPSSASTTVSPSDTANC SVTKIPTVPVKSIPISETPN      | 360 | SOBP_BOVIN   |
| <u>Q0P5V2</u>     | NIPLTDARRKAPSPVATAGQSQGGPSSASTTVSPSDTANC SVTKIPTVPVKSIPISETPN      | 360 | SOBP_MOUSE   |
| <u>A7XYI6</u>     | NIPLTDARRKAPSPVATAGQSQGGPSSASTTVSPSDTANC SVTKIPTVPVKSIPISETPN      | 360 | SOBP_RAT     |
| *****             |                                                                    |     |              |
| <u>Chimp_SOBP</u> | IPVSVQPPASIGPPLGVPPRSPPMVMNTRGVPVLP IFMEQQIMQOIRPPFIRGPPPHAS       | 409 |              |
| <u>A7XYQ1</u>     | IPVSVQPPASIGPPLGVPPRSPPMVMNTRGVPVLP IFMEQQIMQOIRPPFIRGPPPHAS       | 420 | SOBP_HUMAN   |
| <u>A7XYI9</u>     | IPVSVQPPASIGPPLGVPPRSPPMVMNTRGVPVLP IFMEQQIMQOIRPPFIRGPPPHAS       | 420 | A7XYI9_MACMU |
| <u>A7XYH9</u>     | IPVSVQPPASIGPPLGVPPRSPPMVMNTRGVPVLP IFMEQQIMQOIRPPFIRGPPPHAS       | 420 | SOBP_BOVIN   |
| <u>Q0P5V2</u>     | IPVSVQPPASIGPPLGVPPRSPPMVMNTRGVPVLP IFMEQQIMQOIRPPFIRGPPPHAS       | 420 | SOBP_MOUSE   |
| <u>A7XYI6</u>     | IPVSVQPPASIGPPLGVPPRSPPMVMNTRGVPVLP IFMEQQIMQOIRPPFIRGPPPHAS       | 420 | SOBP_RAT     |
| *****             |                                                                    |     |              |
| <u>A7XYQ1</u>     | NPNSPLSNPMLPGIGPPP GGPRNLGPTS SPMPHRPMLSPHHPSTPTMPGNPPGLLPPPP      | 480 | SOBP_HUMAN   |
| <u>A7XYI9</u>     | NPNSPLSNPMLPGIGPPP GGPRNLGPTS SPMPHRPMLSPHHPSTPTMPGNPPGLLPPPP      | 480 | A7XYI9_MACMU |
| <u>A7XYH9</u>     | NPNSPLSNPMLPGIGPPP GGPRNLGPTS SPMPHRPMLSPHHPSTPTMPGNPPGLLPPPP      | 480 | SOBP_BOVIN   |
| <u>Q0P5V2</u>     | NPNSPLSNPMLPGIGPPP GGPRNLGPTS SPMPHRPMLSPHHPSTPTMPGNPPGLLPPPP      | 480 | SOBP_MOUSE   |
| <u>A7XYI6</u>     | NPNSPLSNPMLPGIGPPP GGPRNLGPTS SPMPHRPMLSPHHPSTPTMPGNPPGLLPPPP      | 480 | SOBP_RAT     |
| *****             |                                                                    |     |              |
| <u>Chimp_SOBP</u> | PGAPLPSLPPFPVSMMPNGPMPVQMMNFG LPSLAPLVPPPTLLVFPYPIVPLPVPFIPI       | 499 |              |
| <u>A7XYQ1</u>     | PGAPLPSLPPFPVSMMPNGPMPVQMMNFG LPSLAPLVPPPTLLVFPYPIVPLPVPFIPI       | 540 | SOBP_HUMAN   |
| <u>A7XYI9</u>     | PGAPLPSLPPFPVSMMPNGPMPVQMMNFG LPSLAPLVPPPTLLVFPYPIVPLPVPFIPI       | 540 | A7XYI9_MACMU |
| <u>A7XYH9</u>     | PGAPLPSLPPFPVSMMPNGPMPVQMMNFG LPSLAPLVPPPTLLVFPYPIVPLPVPFIPI       | 540 | SOBP_BOVIN   |
| <u>Q0P5V2</u>     | PGAPLPSLPPFPVSMMPNGPMPVQMMNFG LPSLAPLVPPPTLLVFPYPIVPLPVPFIPI       | 540 | SOBP_MOUSE   |
| <u>A7XYI6</u>     | PGAPLPSLPPFPVSMMPNGPMPVQMMNFG LPSLAPLVPPPTLLVFPYPIVPLPVPFIPI       | 540 | SOBP_RAT     |
| *****             |                                                                    |     |              |
| <u>Chimp_SOBP</u> | IPIPHVSDSKPPNGFSSNGENFIPNAPGDSAAAGGKPSGHSLSPRDSKQSSSKSADSPPG       | 414 |              |
| <u>A7XYQ1</u>     | IPIPHVSDSKPPNGFSSNGENFIPNAPGDSAAAGGKPSGHSLSPRDSKQSSSKSADSPPG       | 600 | SOBP_HUMAN   |
| <u>A7XYI9</u>     | IPIPHVSDSKPPNGFSSNGENFIPNAPGDSAAAGGKPSGHSLSPRDSKQSSSKSADSPPG       | 600 | A7XYI9_MACMU |
| <u>A7XYH9</u>     | IPIPHVSDSKPPNGFSSNGENFIPNAPGDSAAAGGKPSGHSLSPRDSKQSSSKSADSPPG       | 600 | SOBP_BOVIN   |
| <u>Q0P5V2</u>     | IPIPHVSDSKPPNGFSSNGENFIPNAPGDSAAAGGKPSGHSLSPRDSKQSSSKSADSPPG       | 600 | SOBP_MOUSE   |
| <u>A7XYI6</u>     | IPIPHVSDSKPPNGFSSNGENFIPNAPGDSAAAGGKPSGHSLSPRDSKQSSSKSADSPPG       | 600 | SOBP_RAT     |
| *****             |                                                                    |     |              |
| <u>Chimp_SOBP</u> | CSGQAR-----AGSPGPPGAVGQLVFPG-VLQGPQEGVIDLTVG                       | 453 |              |
| <u>A7XYQ1</u>     | CSGQALSLAPTPAEHGERSVVDLTRRAGSPGPPGAGGQLGFPG-VLQGPQEGVIDLTVG        | 659 | SOBP_HUMAN   |
| <u>A7XYI9</u>     | CSGQALSLAPTPAEHGERSVVDLTRRAGSPGPPGAGGQLGFPG-VLQGPQEGVIDLTVG        | 659 | A7XYI9_MACMU |
| <u>A7XYH9</u>     | CSGQALSLAPTPAEHGERSVVDLTRRAGSPGPPGAGGQLGFPG-VLQGPQEGVIDLTVG        | 659 | SOBP_BOVIN   |
| <u>Q0P5V2</u>     | SSGQALSLAP--AERGRGEVVDLTRRAGSPAG--AGQPQFAG-VLHGPDQGVIDLTVG         | 654 | SOBP_MOUSE   |
| <u>A7XYI6</u>     | SSGQALSLAP--SERGRGEVVDLTRRAGSPAG--AGQPQFAG-VLHGPDQGVIDLTVG         | 654 | SOBP_RAT     |
| *****             |                                                                    |     |              |
| <u>Chimp_SOBP</u> | HRARLHNVIHRA LHAHVKAEREPGAERRTCGGCRDGHCSPPAAGDPGPGAPAGPEAAAA       | 513 |              |
| <u>A7XYQ1</u>     | HRARLHNVIHRA LHAHVKAEREPGAERRTCGGCRDGHCSPPAAGDPGPGAPAGPEAAAA       | 719 | SOBP_HUMAN   |
| <u>A7XYI9</u>     | HRARLHNVIHRA LHAHVKAEREPGAERRTCGGCRDGHCSPPAAGDPGPGAPAGPEAAAA       | 719 | A7XYI9_MACMU |
| <u>A7XYH9</u>     | HRARLHNVIHRA LHAHVKAEREPGAERRTCGGCRDGHCSPPAAGDPGPGAPAGPEAAAA       | 717 | SOBP_BOVIN   |
| <u>Q0P5V2</u>     | HRARLHNVIHRA LHAHVKAEREPGAERRTCGGCRDGHCSPPAAGDPGPGAPAGPEAAAA       | 714 | SOBP_MOUSE   |
| <u>A7XYI6</u>     | HRARLHNVIHRA LHAHVKAEREPGAERRTCGGCRDGHCSPPAAGDPGPGAPAGPEAAAA       | 714 | SOBP_RAT     |
| *****             |                                                                    |     |              |
| <u>Chimp_SOBP</u> | CNVIVNGTRG-AAAEAGKSAEPPPEQPPPPPP-APPKLLSPEEPAVSELESVKENNC          | 570 |              |
| <u>A7XYQ1</u>     | CNVIVNGTRG-AAAEAGKSAEPPPEQPPPPPP-APPKLLSPEEPAVSELESVKENNC          | 776 | SOBP_HUMAN   |
| <u>A7XYI9</u>     | CNVIVNGTRG-AAAEAGKSAEPPPEQPPPPPP-APPKLLSPEEPAVSELESVKENNC          | 777 | A7XYI9_MACMU |
| <u>A7XYH9</u>     | CNVIVNGTRG-AAAEAGKSAEPPPEQPPPPPP-APPKLLSPEEPAVSELESVKENNC          | 775 | SOBP_BOVIN   |
| <u>Q0P5V2</u>     | CNVIVNGTRS--APAEAKGAEPPEQPPPPAPP-----KLLSSSEPVVNELESVKENNC         | 767 | SOBP_MOUSE   |
| <u>A7XYI6</u>     | CNVIVNGTRS--APAEAKGAEPPEQPPPPAPP-----KLLSSSEPVVNELESVKENNC         | 767 | SOBP_RAT     |
| *****             |                                                                    |     |              |
| <u>Chimp_SOBP</u> | ASNCHLDGEAAKLLGEEALAGGDKSDPNLNNPADEHDHAYALRMLPKTCGVIQPVKPAE        | 630 |              |
| <u>A7XYQ1</u>     | ASNCHLDGEAAKLLGEEALAGGDKSDPNLNNPADEHDHAYALRMLPKTCGVIQPVKPAE        | 836 | SOBP_HUMAN   |
| <u>A7XYI9</u>     | ASNCHLDGEAAKLLGEEALAGGDKSDPNLNNPADEHDHAYALRMLPKTCGVIQPVKPAE        | 837 | A7XYI9_MACMU |
| <u>A7XYH9</u>     | ASNCHLDGEAAKLLGEEALAGGDKSDPNLNNPADEHDHAYALRMLPKTCGVIQPVKPAE        | 835 | SOBP_BOVIN   |
| <u>Q0P5V2</u>     | ASNCHLDGEAAKLLGEEALAGGDKSDPNLNNPADEHDHAYALRMLPKTCGVIQPVKPAE        | 827 | SOBP_MOUSE   |
| <u>A7XYI6</u>     | ASNCHLDGEAAKLLGEEALAGGDKSDPNLNNPADEHDHAYALRMLPKTCGVIQPVKPAE        | 827 | SOBP_RAT     |
| *****             |                                                                    |     |              |
| <u>Chimp_SOBP</u> | KAMAMP C I I S P M L S A G P E D L E P P L K R R C L R I R N Q N K | 668 |              |
| <u>A7XYQ1</u>     | KAMAMP C I I S P M L S A G P E D L E P P L K R R C L R I R N Q N K | 873 | SOBP_HUMAN   |
| <u>A7XYI9</u>     | KAMAMP C I I S P M L S A G P E D L E P P L K R R C L R I R N Q N K | 874 | A7XYI9_MACMU |
| <u>A7XYH9</u>     | KAMAMP C I I S P M L S A G P E D L E P P L K R R C L R I R N Q N K | 872 | SOBP_BOVIN   |
| <u>Q0P5V2</u>     | KAMAMP C V I S P M L S A G P E D L E P P L K R R C L R I R N Q N K | 864 | SOBP_MOUSE   |
| <u>A7XYI6</u>     | KAMAMP C V I S P M L S A G P E D L E P P L K R R C L R I R N Q N K | 864 | SOBP_RAT     |
| *****             |                                                                    |     |              |
